# Supplementary material
Source: Springer Nature journal article supplement (https://www.springermedizin.de/resource/supplementary/12936_2011_2094_MOESM4_ESM.pdf/9543478)
Supplement: MOESM4 [file 9543478]

## Indochina lineage

| ID   | Microsatellite loci |           |          |                        |        |          |          | No. of isolates |     |     |     |     |     |     |     |     |
|------|---------------------|-----------|----------|------------------------|--------|----------|----------|-----------------|-----|-----|-----|-----|-----|-----|-----|-----|
|      | -29.268kb           | -10.833kb | -2.814kb | <i>pfcr</i> t genotype | 0.59kb | 10.389kb | 23.576kb | Total           | THA | LAO | CAM | BAN | PHI | PNG | VAN | GHA |
| IC1  | 152                 | 180       | 182      | CVIET                  | 150    | 203      | 191      | 47              | 16  | 1   | 18  | 8   |     |     |     | 4   |
|      | 152                 | 180       | 182      | CVIDT                  | 150    | 203      | 191      | 10              |     | 8   | 2   |     |     |     |     |     |
| IC2  | 152                 | 184       | 182      | CVIET                  | 150    | 203      | 191      | 2               | 2   |     |     |     |     |     |     |     |
| IC3  | 152                 | 180       | 182      | CVIET                  | 150    | 203      | 185      | 1               | 1   |     |     |     |     |     |     |     |
| IC4  | 152                 | 180       | 182      | CVIET                  | 150    | 203      | 179      | 1               | 1   |     |     |     |     |     |     |     |
| IC5  | 152                 | 180       | 182      | CVIET                  | 150    | 203      | 187      | 2               | 1   |     | 1   |     |     |     |     |     |
|      | 152                 | 180       | 182      | CVIDT                  | 150    | 203      | 187      | 1               |     | 1   |     |     |     |     |     |     |
| IC6  | 154                 | 180       | 182      | CVIET                  | 150    | 203      | 191      | 3               |     | 1   | 2   |     |     |     |     |     |
|      | 154                 | 180       | 182      | CVIDT                  | 150    | 203      | 191      | 1               |     | 1   |     |     |     |     |     |     |
| IC7  | 152                 | 180       | 182      | CVIET                  | 150    | 197      | 191      | 2               |     | 1   |     |     |     |     |     | 1   |
| IC8  | 152                 | 180       | 182      | CVIET                  | 150    | 203      | 193      | 3               |     | 1   |     | 1   |     |     |     | 1   |
| IC9  | 152                 | 170       | 182      | CVIDT                  | 150    | 203      | 191      | 1               |     | 1   |     |     |     |     |     |     |
| IC10 | 152                 | 180       | 182      | CVIDT                  | 154    | 203      | 189      | 1               |     | 1   |     |     |     |     |     |     |
| IC11 | 152                 | 180       | 182      | CVIET                  | 150    | 203      | 199      | 7               |     |     | 2   | 5   |     |     |     |     |
| IC12 | 152                 | 186       | 182      | CVIET                  | 150    | 203      | 197      | 1               |     |     |     | 1   |     |     |     |     |
| IC13 | 154                 | 180       | 182      | CVIET                  | 150    | 203      | 199      | 2               |     |     |     | 2   |     |     |     |     |
| IC14 | 152                 | 182       | 182      | CVIET                  | 150    | 200      | 185      | 1               |     |     |     | 1   |     |     |     |     |
| IC15 | 152                 | 204       | 182      | CVIET                  | 150    | 200      | 187      | 1               |     |     |     | 1   |     |     |     |     |
| IC16 | 152                 | 180       | 182      | CVIET                  | 150    | 200      | 191      | 5               |     |     |     | 5   |     |     |     |     |
| IC17 | 156                 | 180       | 182      | CVIET                  | 150    | 203      | 191      | 1               |     |     |     | 1   |     |     |     |     |
| IC18 | 152                 | 178       | 182      | CVIET                  | 150    | 203      | 199      | 1               |     |     |     | 1   |     |     |     |     |
| IC19 | 154                 | 170       | 176      | CVIET                  | 150    | 203      | 191      | 1               |     |     |     | 1   |     |     |     |     |
| IC20 | 152                 | 170       | 176      | CVIET                  | 150    | 203      | 191      | 1               |     |     |     | 1   |     |     |     |     |
| IC21 | 152                 | 180       | 182      | CVIET                  | 150    | 206      | 195      | 1               |     |     |     | 1   |     |     |     |     |
| IC22 | 152                 | 180       | 182      | CVIET                  | 150    | 200      | 187      | 1               |     |     |     | 1   |     |     |     |     |
| IC23 | 152                 | 180       | 182      | CVIET                  | 152    | 203      | 187      | 1               |     |     |     | 1   |     |     |     |     |
| IC24 | 152                 | 172       | 182      | CVIET                  | 150    | 206      | 187      | 1               |     |     |     | 1   |     |     |     |     |
| IC25 | 152                 | 180       | 182      | CVIET                  | 148    | 203      | 191      | 1               |     |     |     |     |     |     |     | 1   |
| IC26 | 152                 | 180       | 182      | CVIET                  | 150    | 206      | 189      | 2               |     |     |     |     |     |     |     | 2   |
| IC27 | 152                 | 180       | 182      | CVIET                  | 154    | 197      | 197      | 1               |     |     |     |     |     |     |     | 1   |
| IC28 | 152                 | 180       | 182      | CVIET                  | 154    | 203      | 191      | 1               |     |     |     |     |     |     |     | 1   |
| IC29 | 152                 | 180       | 182      | CVIET                  | 150    | 212      | 205      | 1               |     |     |     |     |     |     |     | 1   |
| IC30 | 154                 | 180       | 182      | CVIET                  | 150    | 203      | 201      | 1               |     |     |     |     |     |     |     | 1   |
| IC31 | 152                 | 180       | 182      | CVIET                  | 148    | 197      | 191      | 1               |     |     |     |     |     |     |     | 1   |
| IC32 | 152                 | 180       | 182      | CVIET                  | 150    | 191      | 191      | 1               |     |     |     |     |     |     |     | 1   |

## Melanesian lineage

| ID  | Microsatellite loci |           |          |                        |        |          |          | No. of isolates |     |     |     |     |     |     |     |     |
|-----|---------------------|-----------|----------|------------------------|--------|----------|----------|-----------------|-----|-----|-----|-----|-----|-----|-----|-----|
|     | -29.268kb           | -10.833kb | -2.814kb | <i>pfcr</i> t genotype | 0.59kb | 10.389kb | 23.576kb | Total           | THA | LAO | CAM | BAN | PHI | PNG | VAN | GHA |
| M1  | 152                 | 172       | 182      | SVMNT                  | 152    | 206      | 187      | 36              |     |     |     |     | 1   | 26  | 9   |     |
| M2  | 152                 | 172       | 176      | CVMNT                  | 152    | 197      | 187      | 3               |     |     |     |     | 3   |     |     |     |
| M3  | 152                 | 170       | 182      | SVMNT                  | 152    | 206      | 187      | 1               |     |     |     |     |     | 1   |     |     |
| M4  | 152                 | 170       | 182      | SVMNT                  | 152    | 197      | 193      | 1               |     |     |     |     |     | 1   |     |     |
| M5  | 152                 | 172       | 182      | SVMNT                  | 150    | 200      | 185      | 1               |     |     |     |     |     | 1   |     |     |
| M6  | 154                 | 172       | 182      | SVMNT                  | 152    | 206      | 187      | 11              |     |     |     |     |     | 4   | 7   |     |
| M7  | 154                 | 164       | 182      | SVMNT                  | 152    | 206      | 187      | 1               |     |     |     |     |     | 1   |     |     |
| M8  | 152                 | 172       | 182      | SVMNT                  | 152    | 206      | 189      | 2               |     |     |     |     |     | 2   |     |     |
| M9  | 154                 | 172       | 182      | SVMNT                  | 152    | 206      | 185      | 1               |     |     |     |     |     | 1   |     |     |
| M10 | 154                 | 172       | 182      | SVMNT                  | 152    | 200      | 187      | 1               |     |     |     |     |     | 1   |     |     |
| M11 | 154                 | 172       | 182      | SVMNT                  | 150    | 194      | 195      | 1               |     |     |     |     |     | 1   |     |     |
| M12 | 152                 | 172       | 184      | SVMNT                  | 152    | 206      | 187      | 1               |     |     |     |     |     |     |     | 1   |
| M13 | 152                 | 172       | 182      | SVMNT                  | 152    | 209      | 187      | 10              |     |     |     |     |     |     |     | 10  |
| M14 | 152                 | 172       | 186      | SVMNT                  | 152    | 206      | 187      | 3               |     |     |     |     |     |     |     | 3   |
| M15 | 150                 | 172       | 182      | SVMNT                  | 152    | 209      | 187      | 1               |     |     |     |     |     |     |     | 1   |

## Philippine lineage

| ID | Microsatellite loci |           |          |                        |        |          |          | No. of isolates |     |     |     |     |     |     |     |     |
|----|---------------------|-----------|----------|------------------------|--------|----------|----------|-----------------|-----|-----|-----|-----|-----|-----|-----|-----|
|    | -29.268kb           | -10.833kb | -2.814kb | <i>pfcr</i> t genotype | 0.59kb | 10.389kb | 23.576kb | Total           | THA | LAO | CAM | BAN | PHI | PNG | VAN | GHA |
| P1 | 152                 | 170       | 190      | SVMNT                  | 142    | 200      | 189      | 12              |     |     |     |     | 12  |     |     |     |
| P2 | 152                 | 170       | 194      | SVMNT                  | 142    | 200      | 189      | 1               |     |     |     |     | 1   |     |     |     |
